# Supplementary material for: Subtle changes in exhaled particle size and phospholipid composition of the respiratory tract lining fluid following moderate-intensity exercise in sub-zero conditions
Source: Research Square preprint supplement (doi:10.21203/rs.3.rs-8084613/v1), 2025-12-01
Supplement: Supplementary file 1 [file b394f96b54d27034d63cf936.docx]

**Supplementary Materials**

1. Supplementary Figures

**Supplementary Figures**

***Supplementary Figure 1.*** *Proportion of the top lipid classes. A: average composition over all measurements, including individual lipid species with abundance >2% in samples. B-E: class composition at each measurement timepoint.*

***Supplementary Figure 2.*** *Total PEx particle count and mass between atopic and non-atopic individuals. A) Mean baseline PEx count for atopic and non-atopic individuals. B) Mean baseline PEx mass for atopic and non-atopic individuals. C) Mean change in total PEx count from pre- to post-exercise across the two trials, in atopic and non-atopic individuals. D) Mean change in total PEx mass from pre- to post-exercise across the two trials, in atopic and non-atopic individuals.*

***Supplementary Figure 3.*** *Proportions of total PEx mass and count by particle size, in atopic versus non-atopic participants. There were no effects of atopy on the prevalence of PEx of different sizes.*

***Supplementary Figure 4.*** *A) Principle component analysis (PCA) scores for lipid proportions before and after exercise. The first two principle components (PC) are displayed, explaining cumulatively 35.4% of the total variance. B) PCA scores for changes in lipid mol% (log2 logit difference) from pre to post exercise, for each trial and between atopic and non-atopic individuals. The first two PCs collectively explain 35.5% of the total variance.*
